# Supplementary figures and images for: PKCη promotes senescence induced by oxidative stress and chemotherapy
Source: PubMed Central journal article supplement — Cell Death Dis. 2014 Nov 20;5(11):e1531–. doi: 10.1038/cddis.2014.481 (PMC4260739; doi:10.1038/cddis.2014.481), 2014-11-20

# Figure S1:

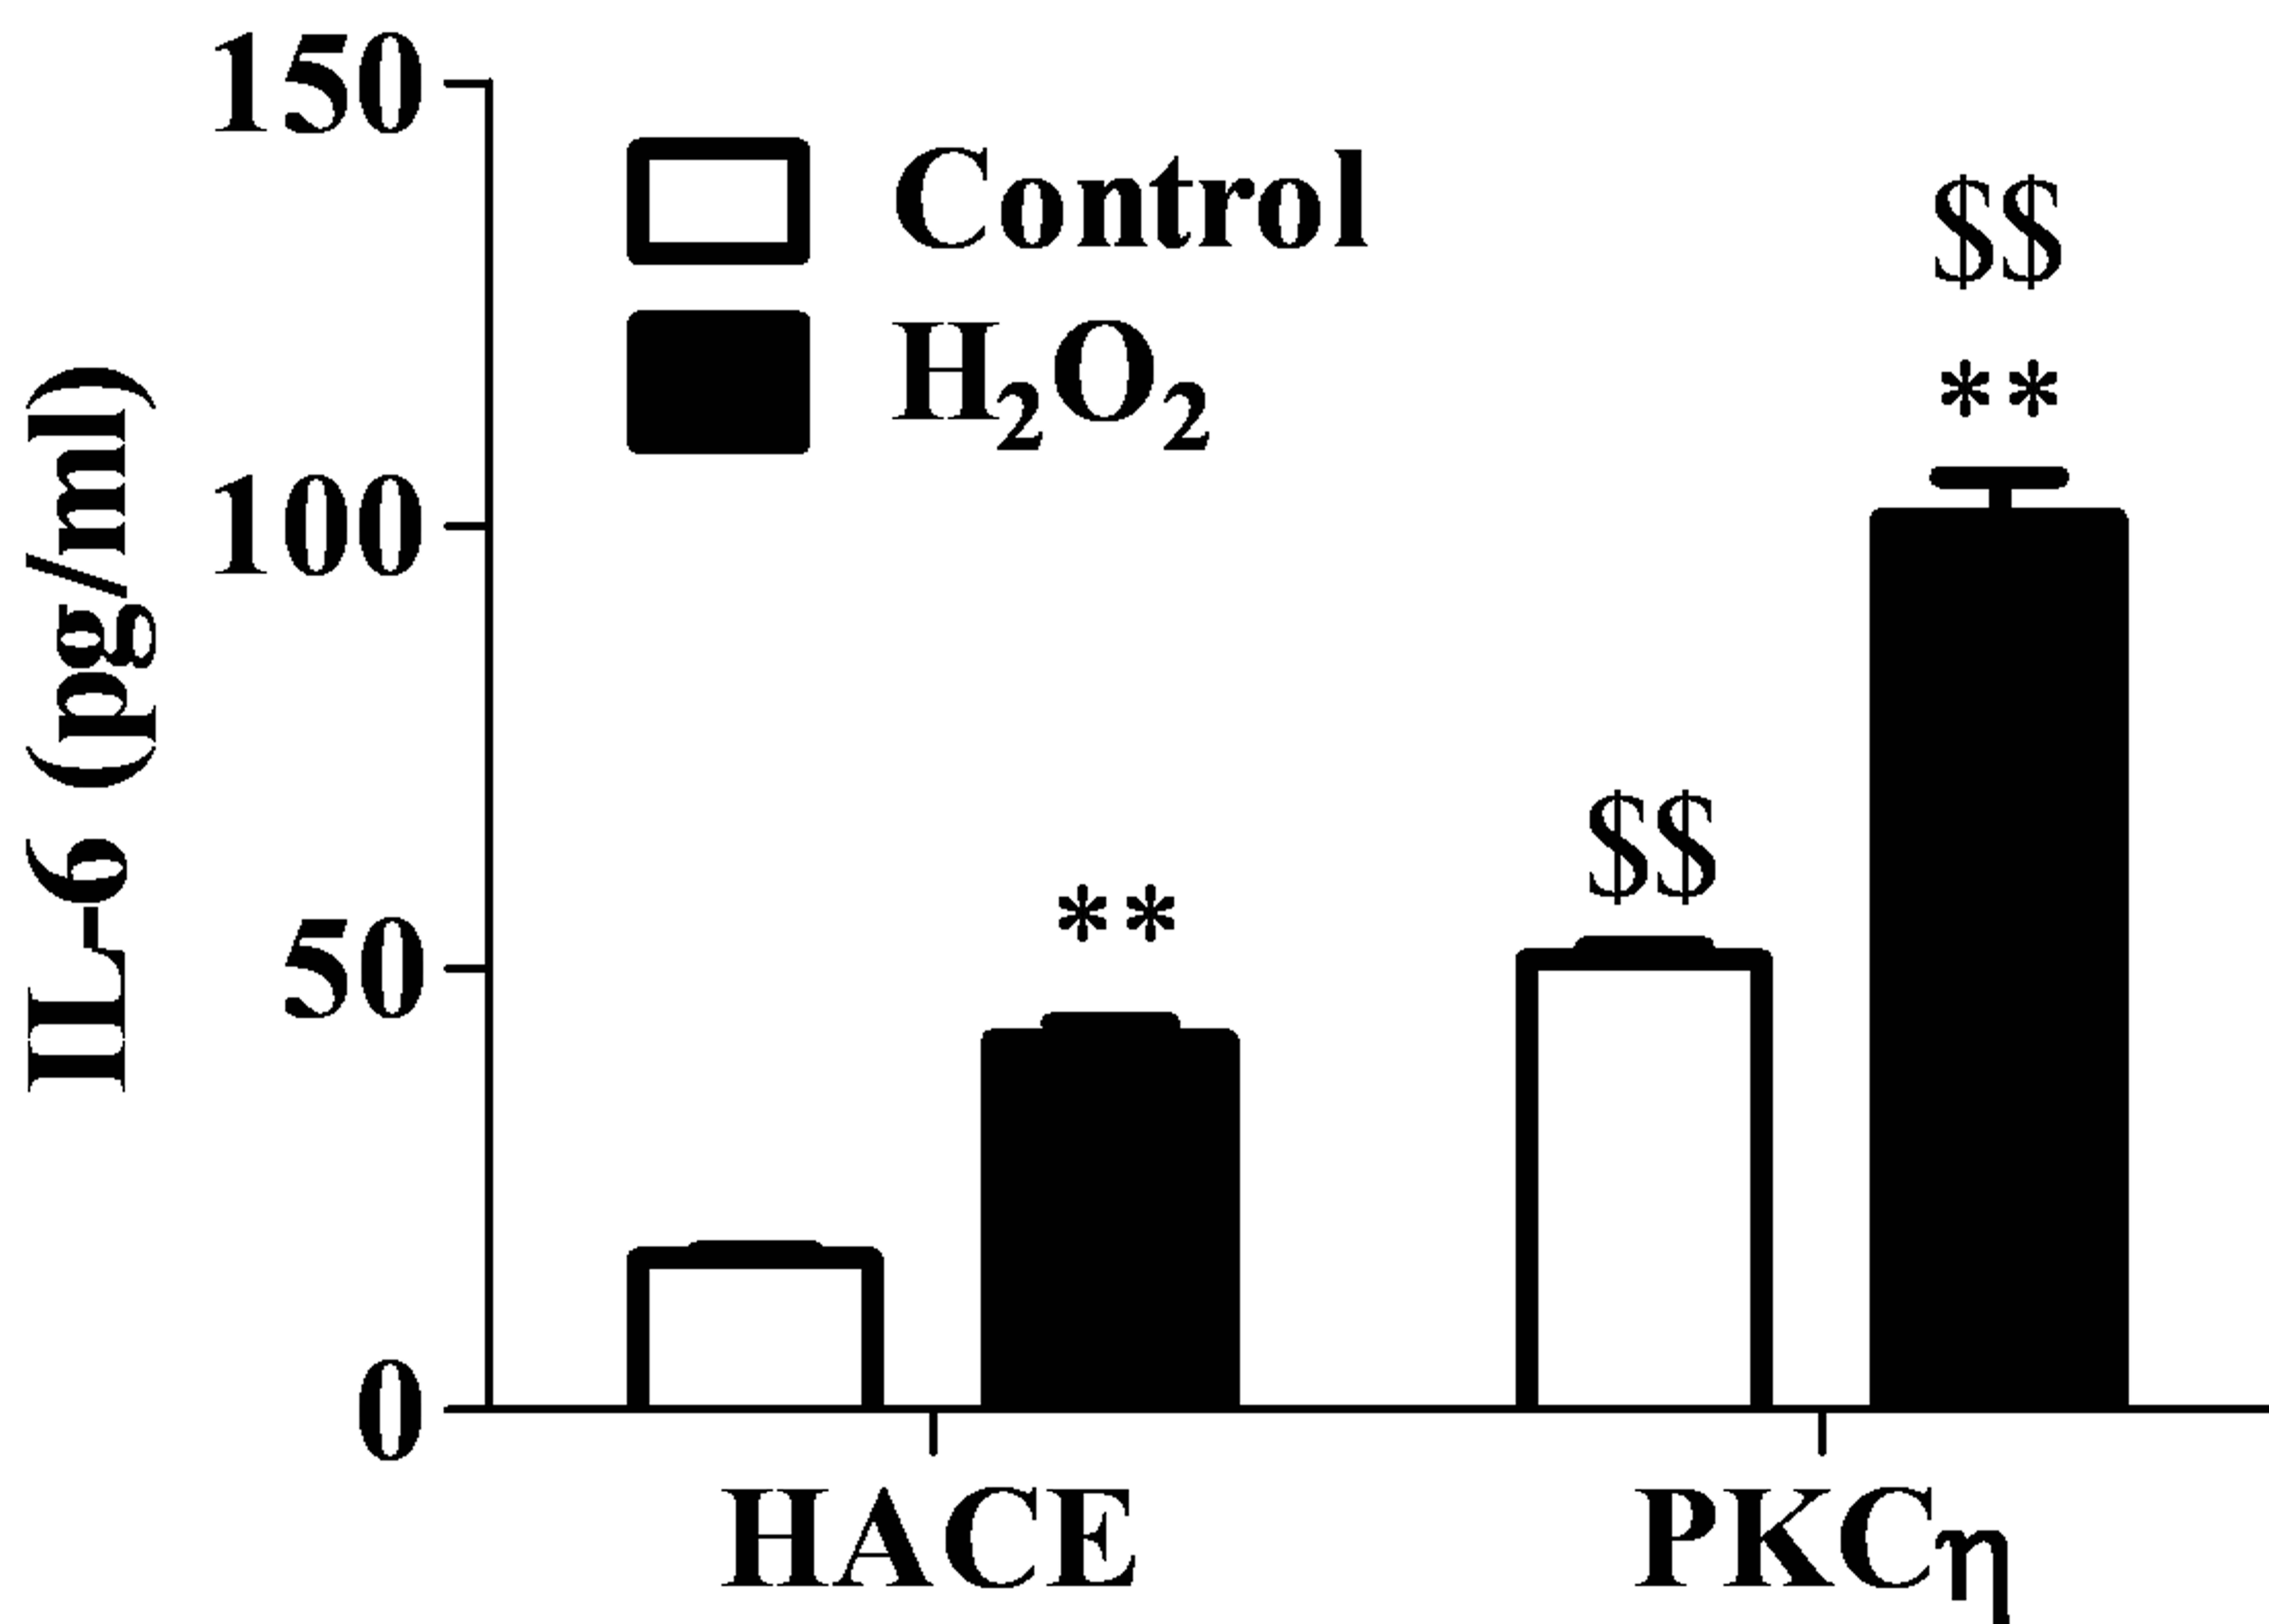

| Plasmid                       | HACE |   | PKC $\eta$ |   |
|-------------------------------|------|---|------------|---|
| H <sub>2</sub> O <sub>2</sub> | -    | + | -          | + |

PKC $\eta$

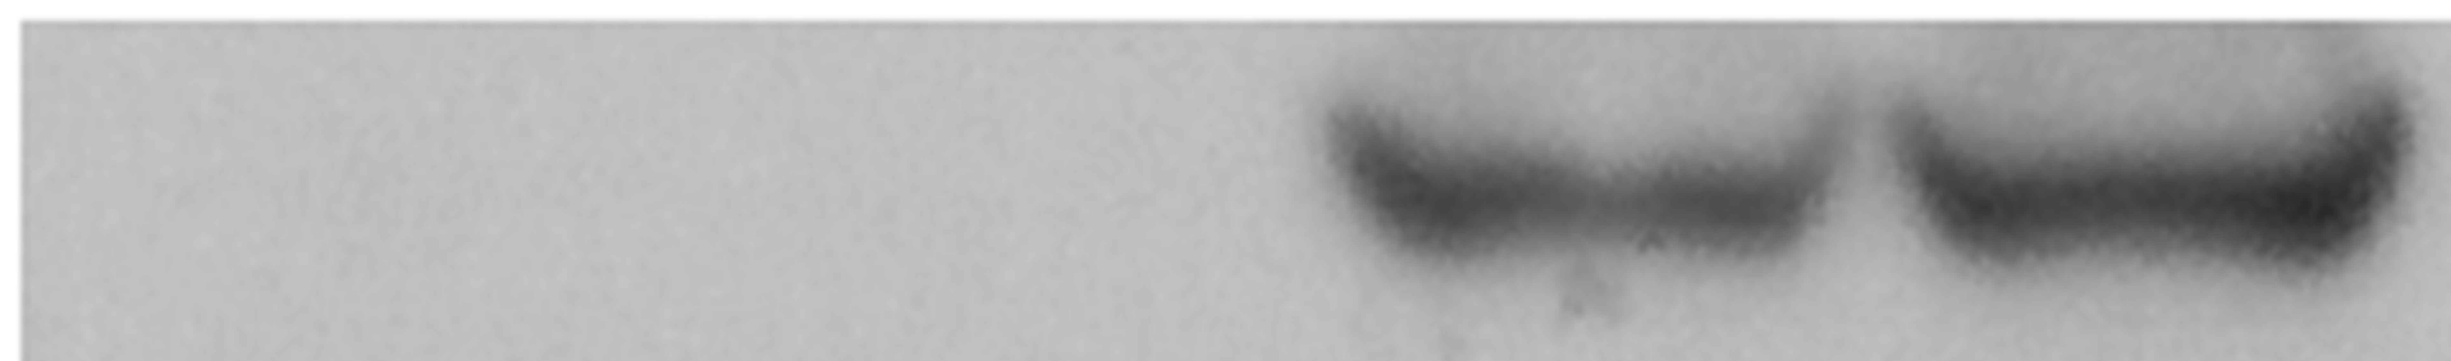

Actin

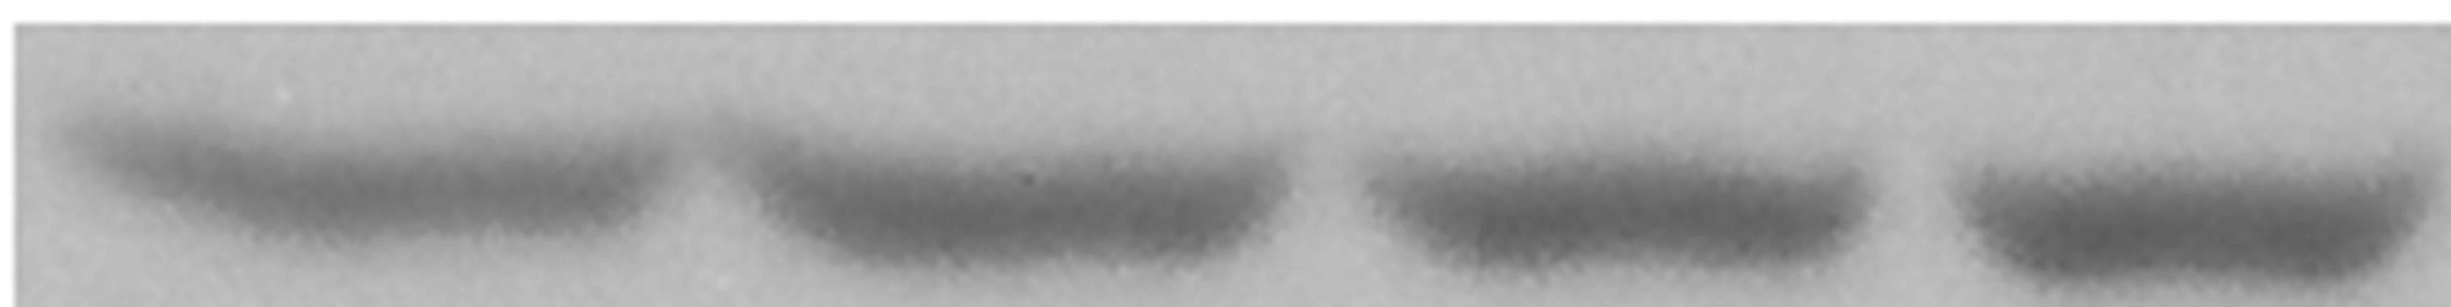

Supplement: cddis2014481x1.pdf [file cddis2014481x1.pdf]
